# Supplementary material for: How Italy Tweeted about COVID-19: Detecting Reactions to the Pandemic from Social Media
Source: MDPI journal article supplement (doi:10.3390/ijerph19137785), 2022-06-24
Supplement: s1 [file s1]

**Table S1.** Selection of themes for the semantic analysis.

| <b>Wang et al. (New York)</b> | <b>Wang et al. (California)</b> | <b>Our study</b>           |
|-------------------------------|---------------------------------|----------------------------|
| Protective Measures           | Protective Measures             | Preventive measures        |
| Pandemic's impact             | The pandemic of COVID-19        | Virus and pandemic impact  |
| Government and Policy         | Government and Policy           | Geopolitics and government |
| Public concern                | Public concern                  | Community                  |
| Impact on life                | Impact on public resources      | Community                  |
| Hospital situation            | Hospital situation              | Medical support            |
| Testing and vaccine           | Test results                    | Medical support            |
| Confirmed cases and deaths    | Confirmed cases and deaths      | Virus and pandemic impact  |
| Medical support               | -                               | Medical support            |
| Government response           | -                               | Geopolitics and government |
| School closure                | -                               | Community                  |
| -                             | State orders                    | Geopolitics and government |
| The impact of COVID-19        | -                               | Virus and pandemic impact  |
| -                             | Bill relief                     | Community                  |
| -                             | Vaccine and Immunization        | Medical support            |
| -                             | Global news                     | Information seeking        |
| -                             | Quarantine                      | Preventive measures        |

**Table S2.** Mean daily frequency of tweet posted by week, 25 February – 4 May 2020.

|                             | All     | Verified | Non-verified |
|-----------------------------|---------|----------|--------------|
| Week 1: 02/25 - 03/01/2020  | 21,720  | 222      | 21,498       |
| Week 2: 03/02 - 03/08/2020  | 69,104  | 1,097    | 68,007       |
| Week 3: 03/09 - 03/15/2020  | 131,563 | 2,030    | 129,532      |
| Week 4: 03/16 - 03/22/2020  | 96,124  | 2,002    | 94,122       |
| Week 5: 03/23 - 03/29/2020  | 85,313  | 2,057    | 83,256       |
| Week 6: 03/30 - 04/05/2020  | 69,476  | 1,834    | 67,642       |
| Week 7: 04/06 - 04/12/2020  | 55,671  | 1,701    | 53,970       |
| Week 8: 04/13 - 04/19/2020  | 56,541  | 1,559    | 54,982       |
| Week 9: 04/20 - 04/26/2020  | 56,641  | 1,548    | 55,093       |
| Week 10: 04/27 - 05/03/2020 | 62,743  | 1,338    | 61,404       |

**Table S3.** Spearman rho correlation between frequency of tweets expressing emotions and frequency of mentions of bigrams related to the different themes identified with the semantic analysis.

| Emotion      | Community | Information seeking | Medical support | Geopolitics and government | Preventive measure | Time    | Virus and pandemic impact |
|--------------|-----------|---------------------|-----------------|----------------------------|--------------------|---------|---------------------------|
| Anger        | -0.632    | -0.055              | -0.006          | -0.104                     | 0.129              | 0.202   | 0.558                     |
| Anticipation | 0.152     | 0.389               | 0.140           | -0.122                     | -0.249             | 0.486   | -0.061                    |
| Disgust      | -0.042    | -0.297              | -0.309          | -0.018                     | 0.176              | -0.030  | 0.055                     |
| Fear         | -0.249    | <b>-0.650*</b>      | -0.109          | -0.231                     | 0.413              | -0.079  | -0.073                    |
| Joy          | 0.460     | <b>0.669*</b>       | 0.528           | 0.374                      | <b>-0.724*</b>     | 0.067   | -0.012                    |
| Sadness      | -0.450    | -0.584              | -0.012          | -0.249                     | 0.413              | 0.140   | 0.073                     |
| Surprise     | -0.037    | 0.425               | <b>0.843*</b>   | -0.025                     | -0.357             | 0.369   | -0.012                    |
| Trust        | 0.455     | 0.588               | 0.430           | 0.515                      | <b>-0.879*</b>     | -0.1224 | 0.115                     |

\*P-value<0.05

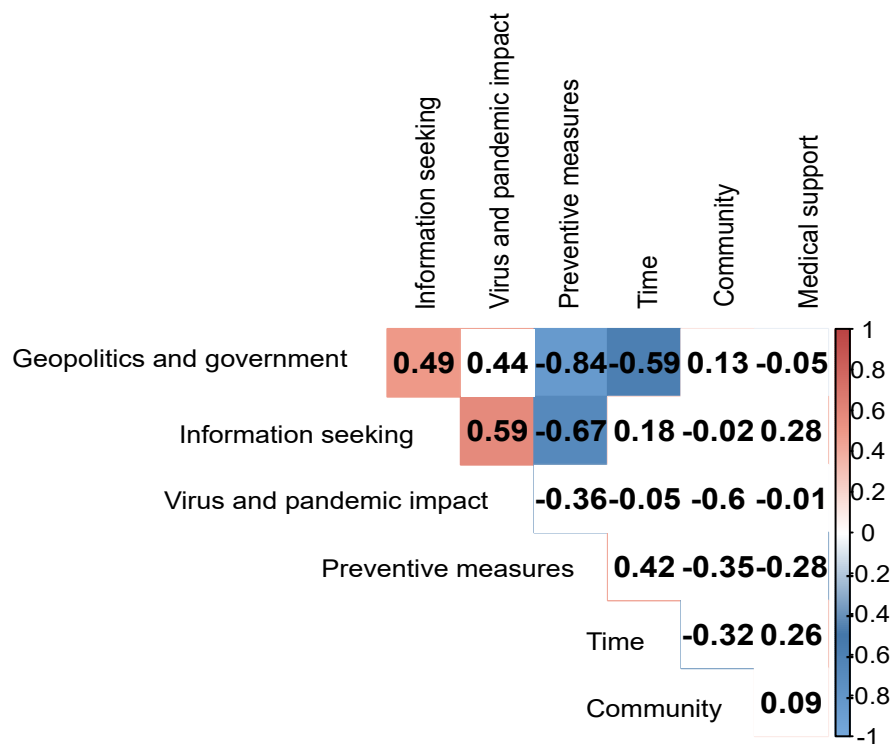

**Figure S1.** Pairwise correlation between themes identified through the semantic analysis.

The Spearman rho correlation coefficients and statistically significant correlations are highlighted in red (for positive correlations) and blue (for negative correlations).

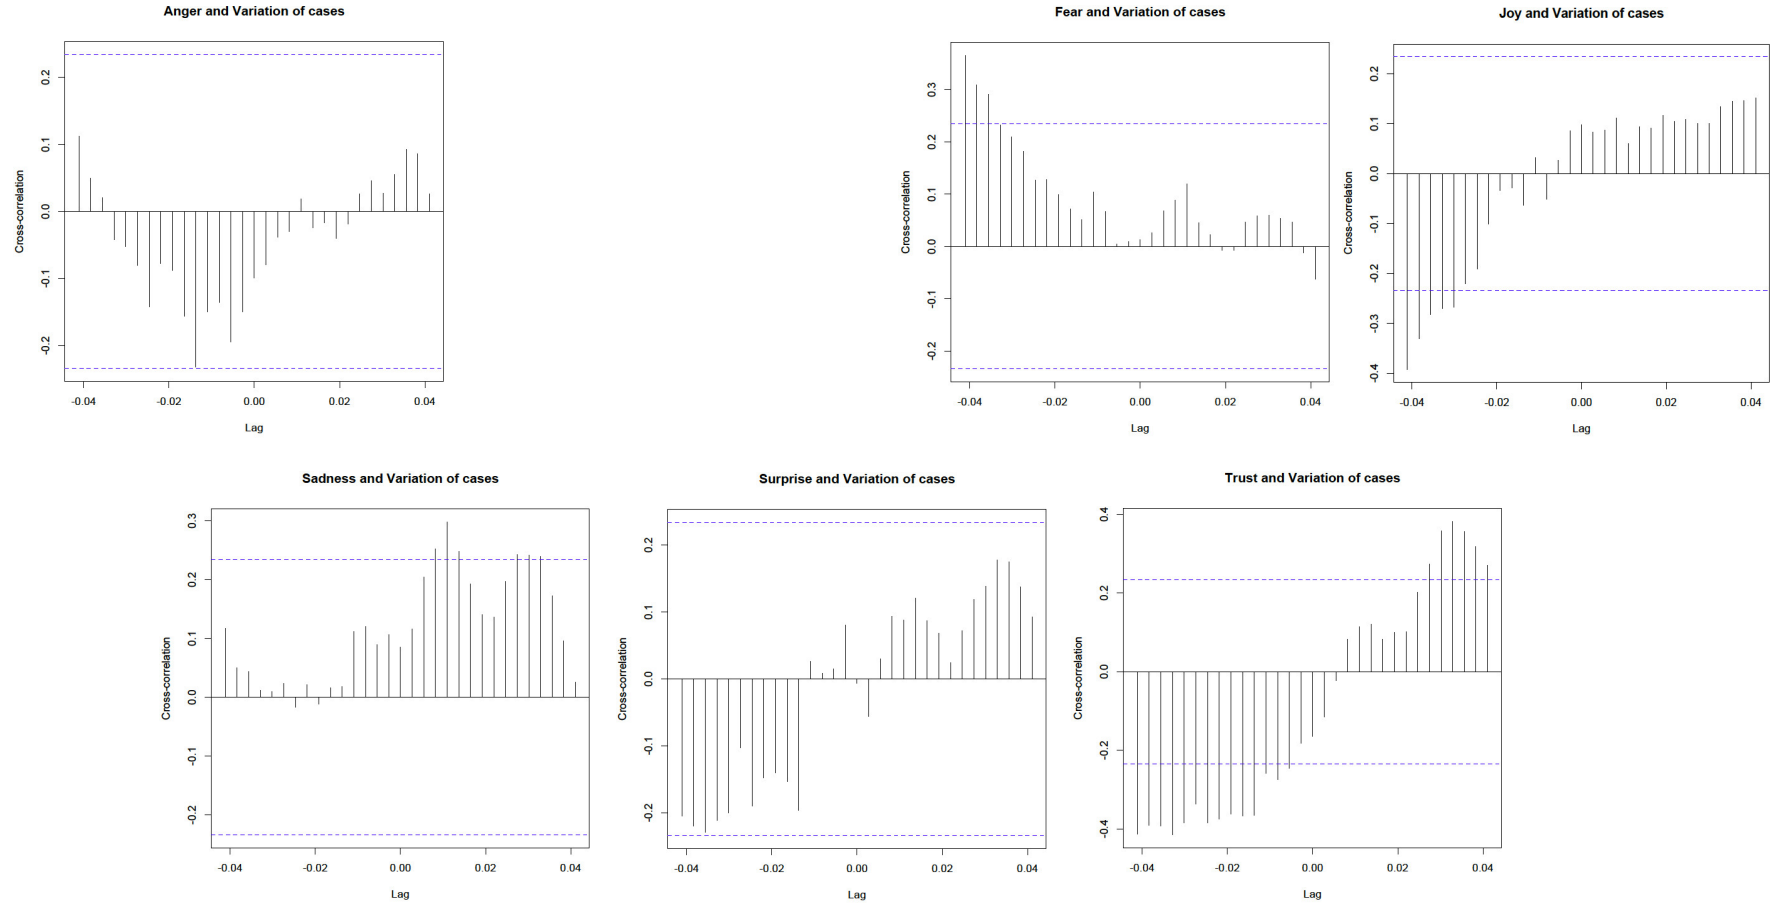

**Figure S2.** The cross-correlation function between each emotion and variations in newly-confirmed cases.

The horizontal blue lines in each graph represent the estimated 95% confidence interval on the cross-correlation function and thus help to identify significant correlations (those exceeding the interval) as well as various negative and positive time lags.

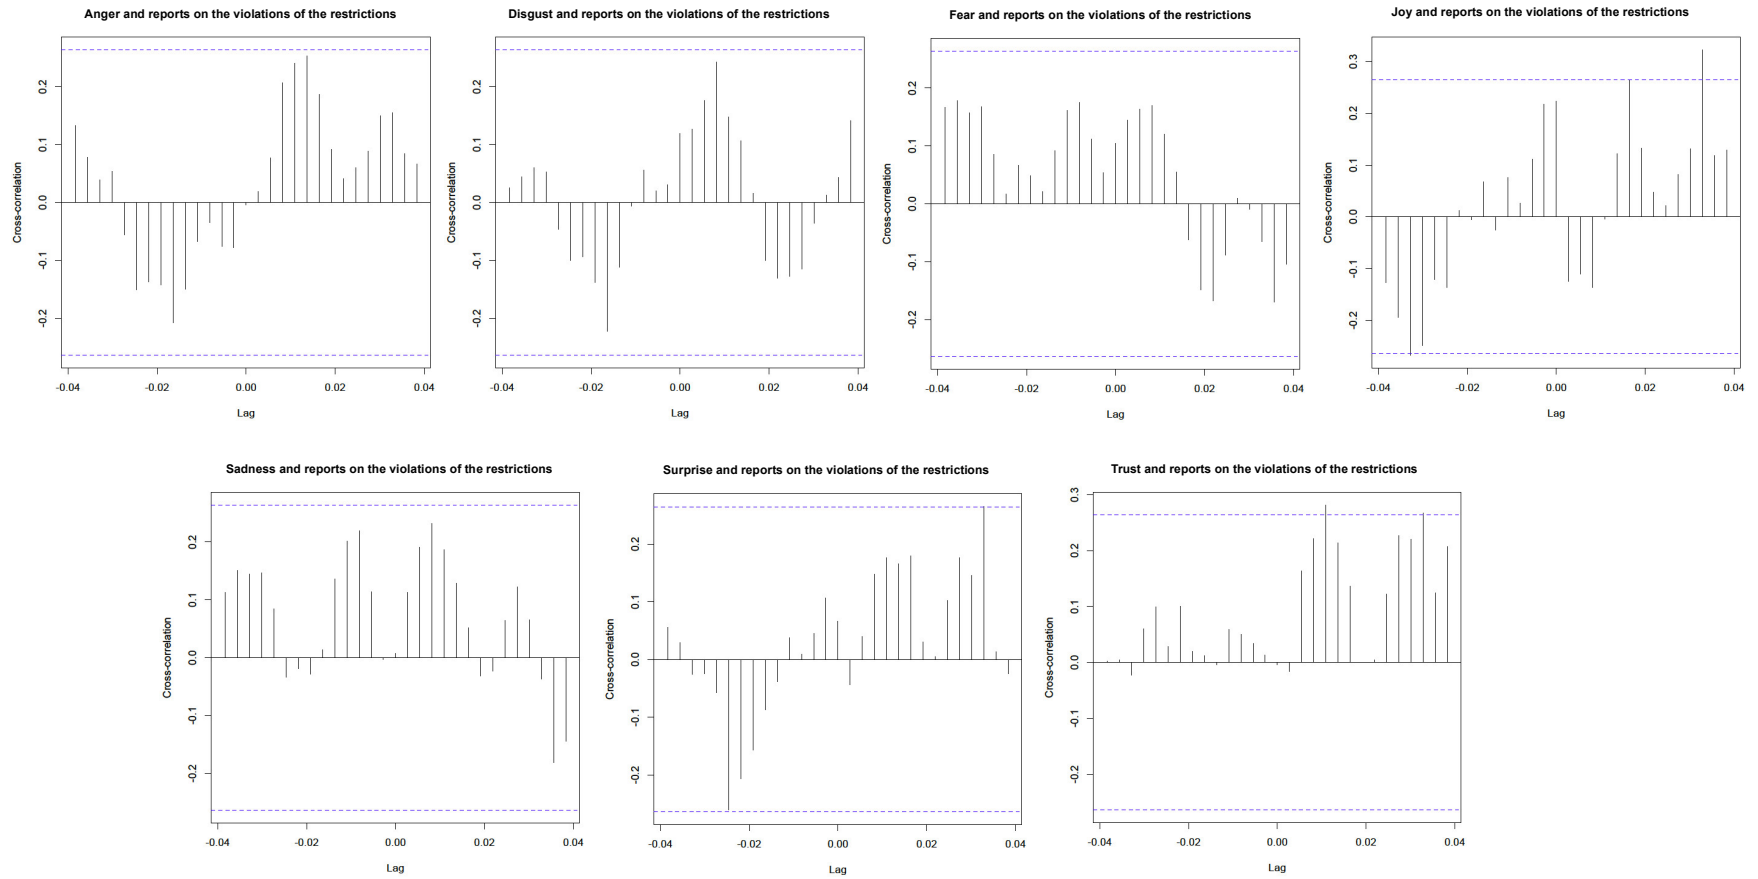

**Figure S3.** The cross-correlation function between each emotion and daily number of subjects fined for specific violations of restrictions.

The horizontal blue lines in each graph represent the estimated 95% confidence interval on the cross-correlation function and thus help to identify significant correlations (those exceeding the interval) as well as various negative and positive time lags.
